# Supplementary material for: Dyspnoea-12: a translation and linguistic validation study in a Swedish setting
Source: PubMed Central journal article supplement — BMJ Open. 2017 Jun 6;7(5):e014490. doi: 10.1136/bmjopen-2016-014490 (PMC5734213; doi:10.1136/bmjopen-2016-014490), 2017-06-06
Supplement: bmjopen-2016-014490.draft_revisions.pdf [file bmjopen-2016-014490.draft_revisions.pdf]

# BMJ Open

## A Swedish version of the Dyspnoea-12

|                                 |                                                                                                                      |
|---------------------------------|----------------------------------------------------------------------------------------------------------------------|
| Journal:                        | <i>BMJ Open</i>                                                                                                      |
| Manuscript ID                   | bmjopen-2016-014490                                                                                                  |
| Article Type:                   | Research                                                                                                             |
| Date Submitted by the Author:   | 27-Sep-2016                                                                                                          |
| Complete List of Authors:       | Sundh, Josefin; School of medical Sciences, Örebro University, Department of Respiratory Medicine<br>Ekström, Magnus |
| <b>Primary Subject Heading</b>: | Respiratory medicine                                                                                                 |
| Secondary Subject Heading:      | Research methods                                                                                                     |
| Keywords:                       | dyspnoea, breathlessness, multidimensional, measurement, Swedish                                                     |
|                                 |                                                                                                                      |

SCHOLARONE™  
Manuscripts

Peer review only

1  
2  
3 **Title: A Swedish version of the Dyspnoea-12**  
4  
5

6 **Running title: Swedish version of D-12**  
7  
8

9 **Authors:** Josefin Sundh, MD, PhD<sup>1</sup>, Magnus Ekström, MD, PhD<sup>2</sup>  
10

11 <sup>1</sup> *Department of Respiratory Medicine, School of Medical Sciences, Örebro University,*  
12 *Örebro, Sweden.*  
13

14 <sup>2</sup> *Department of Clinical Sciences, Division of Respiratory Medicine & Allergology, Lund*  
15 *University, Lund, Sweden*  
16  
17

18  
19  
20  
21  
22  
23  
24 **Corresponding author:** Josefin Sundh, Department of Respiratory Medicine, School of  
25 Medical Sciences, Örebro University, Örebro, Sweden, E-mail [josefin.sundh@oru.se](mailto:josefin.sundh@oru.se), Phone  
26  
27 +46702349517, Fax +4619186526  
28  
29  
30  
31  
32  
33  
34

35 **Word count for body of text:** 1120  
36

37 **Word count for abstract:** 197  
38

39 **Tables:** 0; **Figures:** 1.  
40  
41

42 **Key words:** Dyspnoea; breathlessness, multidimensional, measurement, Swedish  
43  
44  
45  
46  
47  
48  
49  
50  
51  
52  
53  
54  
55  
56  
57  
58  
59  
60

## ABSTRACT

**Background:** Dyspnoea consists of multiple dimensions including the intensity, unpleasantness, sensory qualities and emotional responses which may differ between patient groups, settings and in relation to treatment. Dyspnoea-12 is a validated and convenient instrument for multidimensional measurement in English. We aimed to take forward a Swedish version of Dyspnoea-12.

**Methods:** Translation and linguistic validation of the Dyspnoea-12 was performed (Mapi, Lyon, France). The standardised procedure involved forward and backward translations by two independent certified translators, and revisions after feedback from an in-country linguistic consultant, the developers, and three native physicians. The understanding and convenience of the translated version was evaluated using qualitative in-depth interviews with five patients with dyspnoea.

**Results:** A Swedish version of the Dyspnoea-12 was elaborated and evaluated carefully according to international guidelines. The Swedish version; “Dyspné-12”, has the same layout as the original version, including 12 items distributed on seven physical and five affective items. The Dyspnoea-12 is copyrighted by the developer but can after permission be used free of charge for not industry-funded research.

**Conclusion:** A Swedish version of Dyspnoea-12 is now available for clinical validation and multidimensional measurement across diseases and settings with the aim of improved evaluation and management of dyspnoea.

## Article Summary

### Strengths and limitations of this study

- Translation and linguistic validation of the Dyspnoea-12 to Swedish was performed in a structured multi-stage process in accordance with international guidelines
- Translation of the first version by two independent certified translators, with backwards translation for quality check by an in-country consultant and the developer
- Clinicians review and patients evaluation before establishing the final translated version
- A Swedish version of Dyspnoea-12 is now available for clinical validation across patient populations and settings

## INTRODUCTION

Reduction of symptoms is a major treatment goal in chronic cardiac and respiratory diseases. Dyspnoea is the cardinal symptom in cardiopulmonary disease, including heart failure, chronic obstructive pulmonary disease (COPD) and interstitial lung diseases such as idiopathic pulmonary fibrosis (IPF). Dyspnoea is strongly associated with impaired health related quality of life in COPD (1) and IPF (2), and with increased mortality in COPD (3, 4), IPF (5, 6) and heart failure (7). Despite this fact, clinical practice often focuses on underlying diseases and not on management of the often chronic symptom of dyspnoea itself (8).

### Multiple dimensions of dyspnoea

Traditionally, dyspnoea has been assessed as an indirect measure of functional limitation due to breathlessness, as with the Medical Research Council (MRC) scale (9), or using a single rating scale such as a visual analogue scale (VAS) (10) or Borg scale (11) during exercise tests. However, growing attention has been paid to the fact that dyspnoea consists of multiple important dimensions besides the overall intensity or unpleasantness, such as sensory and affective qualities, the associated emotional responses, and the functional impact on the person's life (12). This makes it difficult to compare findings between patient populations and between differences in responses of separate treatments of dyspnoea (13). Thus, standardised measurements with different dimensions of dyspnoea are needed.

### Dyspnoea-12

The Dyspnoea-12 instrument was developed to be a concise instrument for quantification of different aspects of dyspnoea, valid across different cardiorespiratory diseases (14). In the

1  
2  
3 original study establishing the final version of Dyspnoea-12, the instrument was associated  
4 with MRC in COPD, IPF and heart failure (14). The subsequent validation study showed a  
5 good internal reliability and test-retest reliability, and the Dyspnoea-12 was significantly  
6 correlated to Hospital Anxiety and Depression Scale (HADS), MRC, Forced Expiratory  
7 Volume in one second (FEV<sub>1</sub>) and six minutes walking distance (6MWD) (14). After the  
8 initial validation, further studies have validated the use of Dyspnoea-12 in interstitial lung  
9 disease (15) and COPD (16), but also in asthma (17), pulmonary arterial hypertension (18),  
10 bronchiectasis and tuberculosis destroyed lungs (19).

11  
12 The Dyspnoea-12 is available as English (14), Arabic (16, 20) and Korean (19) versions, but  
13 is to our knowledge not translated to any other European language except English. Until now,  
14 there has been no multidimensional instrument for measurement of dyspnoea available in  
15 Swedish. A Swedish version of Dyspnoea-12 should be of great importance for further  
16 research in the field of breathlessness, especially to be able to compare across populations.  
17 We therefore aimed to develop a linguistically validated Swedish translation of the Dyspnoea-  
18 12.

## 39 40 **METHODS**

41  
42 The translation and linguistic validation of the Dyspnoea-12 to Swedish was performed in a  
43 structured multi-stage process in accordance with international guidelines (21, 22), in  
44 collaboration with a company specialized in translation and validation of patient-reported  
45 outcome measures (Mapi Linguistic Validation, Lyon, France; hereafter referred to as 'Mapi')  
46 (23). Permission to translate Dyspnoea-12 into Swedish was obtained from the developer.  
47  
48  
49  
50  
51  
52  
53  
54  
55  
56  
57  
58  
59  
60

## Translation

The original instrument in British English was translated into Swedish by two independent certified translators. These forward-translations were analysed and reconciled by an in-country consultant to a first translated version. After quality check from Mapi, the first Swedish version was translated back to English and compared with the original version by the developer and by the in-country consultant, to establish a second translated Swedish version.

## Clinicians review

The second translated version was reviewed by three native Swedish-speaking specialists in internal and/or respiratory medicine, including the authors of this paper, in order to provide detailed feedback on the wordings from a clinical perspective. The feedback from the clinicians was considered by Mapi again with input from the in-country consultant and the developer, resulting in a third translated Swedish version.

## Patient interviews

The third translated version was evaluated using individual in-depth interviews with five Swedish patients with dyspnoea, recruited by Mapi and the in-country consultant, in order to investigate if the instrument was easy to understand, assimilate and accept. The feedback from the patients on their understanding and suggested alternative formulations for each item was used for revision and establishment of the final linguistically validated translation.

## Ethics

1  
2  
3 The study was approved by the regional ethics committee at Lund University (DNr: 2016/16).  
4  
5 Written informed consent was not required as no personal data on participants were collected.  
6  
7  
8  
9

## 10 11 **RESULTS**

12  
13  
14 The final certified, linguistically validated Swedish translation of the Dyspnoea-12 is found in  
15  
16 Figure 1. The Swedish version; “Dyspné-12”, has the same layout as the original version  
17  
18 (Figure 2), including 12 items. The clinicians review resulted in several small linguistic  
19  
20 adjustments, after which the instrument copies the original but uses the corresponding  
21  
22 adequate clinical words and expressions in Swedish. The time period of measurement in the  
23  
24 original version is “these days”, which was translated to a corresponding word in Swedish.  
25  
26  
27  
28  
29  
30

## 31 **DISCUSSION**

32  
33  
34 The purpose of this project was to translate and linguistically validate a Swedish version of  
35  
36 the Dyspnoea-12 instrument. The procedure has been performed according to international  
37  
38 guidelines for patient-reported outcomes and have resulted in a convenient instrument for  
39  
40 quantification of different aspects of breathlessness in Swedish research. The instrument  
41  
42 could be used as brief and easy-to use alternative or complement to the instrument Multi-  
43  
44 Dimensional Profile (MDP) (13, 24).  
45  
46  
47

48  
49 Major strengths of Dyspnoea-12 are that it brings a new possibility to deepen the  
50  
51 understanding of breathlessness. Breathlessness is a complex symptom appearing in a  
52  
53 spectrum of cardiorespiratory diseases and is often undertreated (8). Persistent disabling  
54  
55 breathlessness despite treatment has been found common in COPD (25), and further research  
56  
57 is needed to value the impact of different dimensions of breathlessness. The fact that we have  
58  
59  
60



1  
2  
3 presented a Swedish version of Dyspnoea-12 means that we can compare and aggregate  
4  
5 results from different populations and countries.  
6  
7  
8  
9

### 10 11 **Use of the Dyspnoea-12**

12  
13  
14 As described, the Dyspnoea-12 is a brief questionnaire including 12 items rated on a Likert  
15  
16 scale. The items form a two component-structure, where seven items constitute a “physical”  
17  
18 part, and the remaining five items an “affect” part of the instrument. Each item is multiplied  
19  
20 with three to get a final score of 0 to 36; the higher the worse. The author recommends that  
21  
22 the instrument should not be used with more than three missing items. The idea is to get a  
23  
24 general perception of the current state, and thus the term “these days” is suggested. However,  
25  
26 the English version of Dyspnoea-12 has been used for the period of recent two weeks (Marie  
27  
28 Williams, personal communication), and the Swedish version also needs to be validated for  
29  
30 different periods of time. The Dyspnoea-12 is copyrighted by the developers but can after  
31  
32 permission be used free of charge for not industry-funded research.  
33  
34  
35  
36  
37  
38  
39

### 40 **Conclusion**

41  
42  
43 A Swedish version of Dyspnoea-12 is now available for clinical validation and  
44  
45 multidimensional measurement across diseases and settings with the aim of improved  
46  
47 evaluation and management of dyspnoea.  
48  
49  
50  
51  
52

### 53 **ACKNOWLEDGEMENTS**

1  
2  
3 The authors thank Bengt Dahlander, MD, Capio ASIH Nacka, who contributed to the clinical  
4  
5 review of the Dyspnoea-12.  
6  
7  
8  
9

## 10 11 **FUNDING**

12  
13  
14 The study was supported by an unrestricted grant from the Swedish Heart-Lung Foundation  
15  
16 (Nr 20150424).  
17  
18  
19  
20  
21

## 22 23 **REFERENCES**

- 24  
25  
26  
27  
28  
29 1. Bestall JC, Paul EA, Garrod R, Garnham R, Jones PW, Wedzicha JA. Usefulness of the  
30 Medical Research Council (MRC) dyspnoea scale as a measure of disability in patients with chronic  
31 obstructive pulmonary disease. *Thorax*. 1999;54(7):581-6.  
32 2. Nishiyama O, Taniguchi H, Kondoh Y, Kimura T, Ogawa T, Watanabe F, et al. Health-  
33 related quality of life in patients with idiopathic pulmonary fibrosis. What is the main contributing  
34 factor? *Respiratory medicine*. 2005;99(4):408-14.  
35 3. Nishimura K, Izumi T, Tsukino M, Oga T. Dyspnea is a better predictor of 5-year survival  
36 than airway obstruction in patients with COPD. *Chest*. 2002;121(5):1434-40.  
37 4. Casanova C, Marin JM, Martinez-Gonzalez C, de Lucas-Ramos P, Mir-Viladrich I, Cosio  
38 B, et al. Differential effect of mMRC dyspnea, CAT and CCQ for symptom evaluation within the new  
39 GOLD staging and mortality in COPD. *Chest*. 2015.  
40 5. Mura M, Porretta MA, Bargagli E, Sergiacomi G, Zompatori M, Sverzellati N, et al.  
41 Predicting survival in newly diagnosed idiopathic pulmonary fibrosis: a 3-year prospective study. *The*  
42 *European respiratory journal*. 2012;40(1):101-9.  
43 6. Nishiyama O, Taniguchi H, Kondoh Y, Kimura T, Kato K, Kataoka K, et al. A simple  
44 assessment of dyspnoea as a prognostic indicator in idiopathic pulmonary fibrosis. *The European*  
45 *respiratory journal*. 2010;36(5):1067-72.  
46 7. Ekman I, Cleland JG, Swedberg K, Charlesworth A, Metra M, Poole-Wilson PA.  
47 Symptoms in patients with heart failure are prognostic predictors: insights from COMET. *Journal of*  
48 *cardiac failure*. 2005;11(4):288-92.  
49 8. Johnson MJ, Currow DC, Booth S. Prevalence and assessment of breathlessness in the  
50 clinical setting. *Expert review of respiratory medicine*. 2014;8(2):151-61.  
51 9. Mahler DA, Wells CK. Evaluation of clinical methods for rating dyspnea. *Chest*.  
52 1988;93(3):580-6.  
53 10. Lansing RW, Moosavi SH, Banzett RB. Measurement of dyspnea: word labeled visual  
54 analog scale vs. verbal ordinal scale. *Respiratory physiology & neurobiology*. 2003;134(2):77-83.  
55 11. Borg GA. Psychophysical bases of perceived exertion. *Medicine and science in sports*  
56 *and exercise*. 1982;14(5):377-81.  
57  
58  
59  
60

12. Parshall MB, Schwartzstein RM, Adams L, Banzett RB, Manning HL, Bourbeau J, et al. An official American Thoracic Society statement: update on the mechanisms, assessment, and management of dyspnea. *American journal of respiratory and critical care medicine*. 2012;185(4):435-52.
13. Banzett RB, O'Donnell CR, Guilfoyle TE, Parshall MB, Schwartzstein RM, Meek PM, et al. Multidimensional Dyspnea Profile: an instrument for clinical and laboratory research. *The European respiratory journal*. 2015;45(6):1681-91.
14. Yorke J, Moosavi SH, Shuldham C, Jones PW. Quantification of dyspnoea using descriptors: development and initial testing of the Dyspnoea-12. *Thorax*. 2010;65(1):21-6.
15. Yorke J, Swigris J, Russell AM, Moosavi SH, Ng Man Kwong G, Longshaw M, et al. Dyspnea-12 is a valid and reliable measure of breathlessness in patients with interstitial lung disease. *Chest*. 2011;139(1):159-64.
16. Alyami MM, Jenkins SC, Lababidi H, Hill K. Reliability and validity of an arabic version of the dyspnea-12 questionnaire for Saudi nationals with chronic obstructive pulmonary disease. *Ann Thorac Med*. 2015;10(2):112-7.
17. Yorke J, Russell AM, Swigris J, Shuldham C, Haigh C, Rochnia N, et al. Assessment of dyspnea in asthma: validation of The Dyspnea-12. *The Journal of asthma : official journal of the Association for the Care of Asthma*. 2011;48(6):602-8.
18. Yorke J, Armstrong I. The assessment of breathlessness in pulmonary arterial hypertension: reliability and validity of the Dyspnoea-12. *European journal of cardiovascular nursing : journal of the Working Group on Cardiovascular Nursing of the European Society of Cardiology*. 2014;13(6):506-14.
19. Lee BY, Lee S, Lee JS, Song JW, Lee SD, Jang SH, et al. Validity and Reliability of CAT and Dyspnea-12 in Bronchiectasis and Tuberculous Destroyed Lung. *Tuberculosis and respiratory diseases*. 2012;72(6):467-74.
20. Al-Gamal E, Yorke J, Al-Shwaiyat MK. Dyspnea-12-Arabic: testing of an instrument to measure breathlessness in Arabic patients with chronic obstructive pulmonary disease. *Heart & lung : the journal of critical care*. 2014;43(3):244-8.
21. Wild D, Grove A, Martin M, Eremenco S, McElroy S, Verjee-Lorenz A, et al. Principles of Good Practice for the Translation and Cultural Adaptation Process for Patient-Reported Outcomes (PRO) Measures: report of the ISPOR Task Force for Translation and Cultural Adaptation. *Value in health : the journal of the International Society for Pharmacoeconomics and Outcomes Research*. 2005;8(2):94-104.
22. Wild D, Eremenco S, Mear I, Martin M, Houchin C, Gawlicki M, et al. Multinational trials-recommendations on the translations required, approaches to using the same language in different countries, and the approaches to support pooling the data: the ISPOR Patient-Reported Outcomes Translation and Linguistic Validation Good Research Practices Task Force report. *Value in health : the journal of the International Society for Pharmacoeconomics and Outcomes Research*. 2009;12(4):430-40.
23. 2016. Available from: <http://mapigroup.com/>.
24. Morelot-Panzini C, Gilet H, Aguilaniu B, Devillier P, Didier A, Perez T, et al. Real-life assessment of the multidimensional nature of dyspnoea in COPD outpatients. *The European respiratory journal*. 2016;47(6):1668-79.
25. Sundh J EM. Persistent disabling breathlessness in chronic obstructive pulmonary disease. *International journal of chronic obstructive pulmonary disease*. 2016: In press.

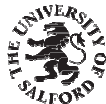

# Dyspné-12

**Detta frågeformulär är utformat för att hjälpa oss att ta reda på mer om hur din andning besvärar dig.**

Läs varje påstående och kryssa sedan i den ruta som bäst stämmer överens med din andning överlag **på senare tid**. Om du inte upplever ett symtom, kryssa i rutan "Upplever inte alls". Vänligen svara på alla påståendena.

**Namn:** ..... **ID:** ..... **Datum:** .... /..... /.....

| Påstående                                     | Upplever inte alls | Lindrigt | Måttligt | Svårt |
|-----------------------------------------------|--------------------|----------|----------|-------|
| 1. Jag kan inte ta djupa andetag              |                    |          |          |       |
| 2. Min andning är ansträngande                |                    |          |          |       |
| 3. Jag känner mig andfådd                     |                    |          |          |       |
| 4. Jag har svårt att hämta andan              |                    |          |          |       |
| 5. Jag får inte tillräckligt med luft         |                    |          |          |       |
| 6. Min andning är obehaglig                   |                    |          |          |       |
| 7. Min andning är utmattande                  |                    |          |          |       |
| 8. Min andning får mig att känna mig nedstämd |                    |          |          |       |
| 9. Min andning får mig att känna mig olycklig |                    |          |          |       |
| 10. Min andning är bekymmersam                |                    |          |          |       |
| 11. Min andning gör mig uppstressad           |                    |          |          |       |
| 12. Min andning är besvärande                 |                    |          |          |       |

# BMJ Open

## Dyspnoea-12: A linguistic validation of a Swedish version

|                                 |                                                                                                                      |
|---------------------------------|----------------------------------------------------------------------------------------------------------------------|
| Journal:                        | <i>BMJ Open</i>                                                                                                      |
| Manuscript ID                   | bmjopen-2016-014490.R1                                                                                               |
| Article Type:                   | Research                                                                                                             |
| Date Submitted by the Author:   | 29-Dec-2016                                                                                                          |
| Complete List of Authors:       | Sundh, Josefin; School of medical Sciences, Örebro University, Department of Respiratory Medicine<br>Ekström, Magnus |
| <b>Primary Subject Heading</b>: | Respiratory medicine                                                                                                 |
| Secondary Subject Heading:      | Research methods                                                                                                     |
| Keywords:                       | dyspnoea, multidimensional, measurement, Swedish, translation                                                        |
|                                 |                                                                                                                      |

SCHOLARONE™  
Manuscripts

Peer review only

1  
2  
3 **Title: Dyspnoea-12: A linguistic validation of a Swedish version**  
4  
5  
6  
7  
8

9  
10 **Running title: Swedish version of D-12**  
11

12 **Authors:** Josefin Sundh, MD, PhD<sup>1</sup>, Magnus Ekström, MD, PhD<sup>2</sup>  
13

14  
15 <sup>1</sup> *Department of Respiratory Medicine, School of Medical Sciences, Örebro University,*  
16  
17 *Örebro, Sweden.*  
18

19  
20 <sup>2</sup> *Department of Clinical Sciences, Division of Respiratory Medicine & Allergology, Lund*  
21  
22 *University, Lund, Sweden*  
23  
24

25  
26  
27  
28 **Corresponding author:** Josefin Sundh, Department of Respiratory Medicine, School of  
29  
30 Medical Sciences, Örebro University, Örebro, Sweden, E-mail [josefin.sundh@oru.se](mailto:josefin.sundh@oru.se), Phone  
31  
32 +46702349517, Fax +4619186526  
33  
34  
35  
36  
37

38 **Word count for body of text:** 1544  
39

40  
41 **Word count for abstract:** 201  
42

43  
44 **Tables:** 0; **Figures:** 2.  
45

46  
47 **Key words:** Dyspnoea; multidimensional, measurement, Swedish, translation  
48  
49  
50  
51  
52  
53  
54  
55  
56  
57  
58  
59  
60

## ABSTRACT

**Background:** Dyspnoea consists of multiple dimensions including the intensity, unpleasantness, sensory qualities and emotional responses which may differ between patient groups, settings and in relation to treatment. The Dyspnoea-12 is a validated and convenient instrument for multidimensional measurement in English. We aimed to take forward a Swedish version of the Dyspnoea-12.

**Methods:** The linguistic validation of the Dyspnoea-12 was performed (Mapi Language Services, Lyon, France). The standardised procedure involved forward and backward translations by three independent certified translators, and revisions after feedback from an in-country linguistic consultant, the developers, and three native physicians. The understanding and convenience of the translated version was evaluated using qualitative in-depth interviews with five patients with dyspnoea.

**Results:** A Swedish version of the Dyspnoea-12 was elaborated and evaluated carefully according to international guidelines. The Swedish version; “Dyspné-12”, has the same layout as the original version, including 12 items distributed on seven physical and five affective items. The Dyspnoea-12 is copyrighted by the developer but can be used free of charge after permission for not industry-funded research.

**Conclusion:** A Swedish version of the Dyspnoea-12 is now available for clinical validation and multidimensional measurement across diseases and settings with the aim of improved evaluation and management of dyspnoea.

## Article Summary

### Strengths and limitations of this study

- The linguistic validation of the Dyspnoea-12 to Swedish was performed using a structured multi-stage process in accordance with international guidelines, involving translations by two independent certified translators, a backward translation for quality check, and review by clinicians and test on patients with dyspnoea before establishing the final Swedish version
- A Swedish version of the Dyspnoea-12 will enable to conduct clinical validation studies across patient populations and settings, and will bring a new possibility to deepen the understanding of breathlessness and to value the impact of different dimensions of breathlessness.
- The translated version of the Dyspnoea-12 still needs to be psychometrically validated in a clinical Swedish population.



## 1 INTRODUCTION

2 Reduction of symptoms is a major treatment goal in chronic cardiac and respiratory diseases.  
3 Dyspnoea is the cardinal symptom in cardiopulmonary diseases, including heart failure,  
4 chronic obstructive pulmonary disease (COPD) and interstitial lung diseases such as  
5 idiopathic pulmonary fibrosis (IPF). Dyspnoea is strongly associated with impaired health  
6 related quality of life in COPD (1) and IPF (2), and with increased mortality in COPD (3, 4),  
7 IPF (5, 6) and heart failure (7). Despite this fact, clinical practice often focuses on underlying  
8 diseases and not on the management of the often chronic symptom of dyspnoea itself (8).

### 9 10 **Multiple dimensions of dyspnoea**

11 Traditionally, dyspnoea has been assessed as an indirect measure of functional limitation due  
12 to breathlessness, as with the Medical Research Council (MRC) scale (9), or using a single  
13 rating scale such as a visual analogue scale (VAS) (10) or Borg scale (11) during exercise  
14 tests. However, growing attention has been paid to the fact that dyspnoea consists of multiple  
15 important dimensions besides the overall intensity or unpleasantness, such as sensory and  
16 affective qualities, associated emotional responses, and the functional impact on the person's  
17 life (12). This makes it difficult to compare findings between patient populations and between  
18 differences in responses of separate treatments of dyspnoea (13). Thus, standardised  
19 measurements with different dimensions of dyspnoea are needed.

### 20 21 **Dyspnoea-12**

22 The Dyspnoea-12 instrument was developed to be a concise instrument for quantification of  
23 different aspects of dyspnoea, valid across different cardiorespiratory diseases (14). In the

1  
2  
3 1 original study establishing the final version of the Dyspnoea-12, the instrument was  
4  
5 2 associated with the MRC scale in COPD, IPF and heart failure (14). The subsequent  
6  
7 3 validation study showed a good internal reliability and test-retest reliability, and the  
8  
9 4 Dyspnoea-12 was significantly correlated to the Hospital Anxiety and Depression Scale  
10  
11 5 (HADS), the MRC scale, the Forced Expiratory Volume in one second (FEV<sub>1</sub>) and the six  
12  
13 6 minutes walking distance (6MWD) test (14). After the initial validation, further studies have  
14  
15 7 validated the use of the Dyspnoea-12 in interstitial lung disease (15) and COPD (16), but also  
16  
17 8 in asthma (17), pulmonary arterial hypertension (18), bronchiectasis and tuberculosis  
18  
19 9 destroyed lungs (19).

20  
21  
22  
23  
24 10 The Dyspnoea-12 is available in English (14), Arabic (16, 20) and Korean (19), but has to  
25  
26 11 our knowledge not been translated into any other European language except English. A  
27  
28 12 multidimensional instrument for assessment of dyspnoea in cancer, the Cancer Dyspnoea  
29  
30 13 Scale, has been developed (21) and validated in Swedish (22), and recently the  
31  
32 14 Multidimensional Dyspnoea Profile (13) has been linguistically validated in Swedish (23).  
33  
34 15 However, a brief and convenient multidimensional instrument that allows comparison across  
35  
36 16 diseases would be of additional value. Until now, there has been no multidimensional  
37  
38 17 instrument for measurement of dyspnoea available in Swedish. A Swedish version of  
39  
40 18 Dyspnoea-12 should be of great importance for further research in the field of breathlessness,  
41  
42 19 especially to be able to make comparisons across populations. We therefore aimed to develop  
43  
44 20 a linguistically validated Swedish version of the Dyspnoea-12.  
45  
46  
47  
48

49 21

## 50 51 52 22 **METHODS**

### 53 54 55 23 **The Dyspnoea-12 instrument**

56  
57  
58  
59  
60

1  
2  
3 1 The Dyspnoea-12 instrument includes 12 descriptors assessed on a four-point scale such as  
4  
5 2 none (score 0), mild (1), moderate (2) or severe (3), resulting in a total score from 0 to 36  
6  
7 3 where a higher score corresponds to more severe breathlessness. The first seven items  
8  
9 4 constitute a physical domain assessing whether the breath does not go in all the way, the  
10  
11 5 patient cannot get enough air, feels short of breath or has difficulty catching breath, and the  
12  
13 6 breathing requires more work, is uncomfortable or exhausting. The remaining five items  
14  
15 7 constitute an emotional domain where the items describe whether the breathing is distressing,  
16  
17 8 irritating or makes the patient feel depressed, miserable or agitated. A physical and an  
18  
19 9 emotional component score can be calculated, with maximum score of 21 and 15,  
20  
21 10 respectively. A minimal important clinical difference (MCID) of 3 units has been  
22  
23 11 recommended (24).  
24  
25  
26  
27  
28  
29  
30

### 31 **Linguistic validation**

32  
33  
34 14 The linguistic validation of the Dyspnoea-12 into Swedish was performed in a structured  
35  
36 15 multi-stage process in accordance with international guidelines (25, 26), in collaboration with  
37  
38 16 a company specialized in translation and validation of patient-reported outcome measures  
39  
40 17 (Mapi Language Services, Lyon, France; hereafter referred to as 'Mapi') (27). Permission to  
41  
42 18 translate the Dyspnoea-12 into Swedish was obtained from the developer. The role of Mapi  
43  
44 19 was to supply translators and to perform quality checks in collaboration with the developer.  
45  
46  
47 20 The whole process is summarised in Figure 1.  
48  
49  
50  
51  
52  
53  
54 22 *Translation*

1  
2  
3 1 Two independent certified translators, native speakers of Swedish and living in Sweden,  
4  
5 2 translated the original instrument developed in British English into Swedish. These two  
6  
7 3 forward-translations were analysed and reconciled by an in-country consultant into a first  
8  
9 4 translated version. After a quality check from Mapi, the first Swedish version was translated  
10  
11 5 back into English and compared with the original British version by the developer and by the  
12  
13 6 in-country consultant, to establish a second translated Swedish version.  
14  
15  
16  
17  
18  
19

#### 20 8 *Clinicians' review*

21  
22  
23 9 The second translated version was reviewed by three native Swedish-speaking specialists in  
24  
25 10 internal and/or respiratory medicine, including the authors of this paper, in order to provide  
26  
27 11 detailed feedback on the wordings from a clinical perspective. The feedback from the  
28  
29 12 clinicians was considered by Mapi again with input from the in-country consultant and the  
30  
31 13 developer, resulting in a third translated Swedish version.  
32  
33  
34  
35  
36  
37

#### 38 15 *Patients' interviews*

39  
40  
41 16 The third translated version was evaluated using a validated method of individual in-depth  
42  
43 17 interviews (27) with five Swedish patients with dyspnoea, recruited by Mapi and the in-  
44  
45 18 country consultant, in order to investigate if the instrument was easy to understand, assimilate  
46  
47 19 and accept. The patients were interviewed face-to-face by the local consultant. The patients  
48  
49 20 were asked to complete the questionnaire and subsequently make general comments and  
50  
51 21 answer two specific questions for each item. They were told that the intention was to assess  
52  
53 22 whether the questionnaire was comprehensible and acceptable for them, but not to evaluate  
54  
55 23 their answers to the items. The first question was "What does the  
56  
57  
58  
59  
60

1  
2  
3 1 instructions/question/response choice mean for you?”, and encouraged the respondents to  
4  
5 2 reword the item using other words that those used or to give examples. The second question  
6  
7 3 was “Did you have difficulty understanding the instructions/question/response choice?”, and  
8  
9 4 also included follow-up questions if there were words that were difficult to understand and  
10  
11 5 suggested changes of the wording. The patients were encouraged to speak and to express their  
12  
13 6 feelings about the questions without being interrupted. The consultant was attentive to any  
14  
15 7 non-verbal or verbal signs betraying the way the respondents felt. The interviews took  
16  
17 8 approximately one hour each, and were transcribed verbatim. The feedback from the patients  
18  
19 9 on their understanding and suggested alternative formulations for each item was used for  
20  
21 10 revision and establishment of the final linguistically validated translation.  
22  
23  
24  
25  
26  
27  
28  
29

## 30 **Ethics**

31  
32 13 The study was approved by the regional ethics committee at Lund University (DNr: 2016/16).  
33  
34 14 Written informed consent for the translation process and clinicians’ review was not required  
35  
36 15 as no personal data on participants were collected. Oral consent was received from the five  
37  
38 16 patients for the in-depth interviews.  
39  
40  
41  
42  
43  
44

## 45 **RESULTS**

46  
47  
48 19 The final certified, linguistically validated Swedish translation of the Dyspnoea-12 is found in  
49  
50 20 Figure 2. The Swedish version; “Dyspné-12”, has the same layout as the original version ,  
51  
52 21 including 12 items. The clinicians review resulted in several small linguistic adjustments,  
53  
54 22 after which the instrument was conceptually equivalent to the original but uses the  
55  
56 23 corresponding adequate clinical words and expressions in Swedish. The in-depth interviews  
57  
58  
59  
60

1  
2  
3 1 with five patients did not result in any further changes. The time period of measurement in the  
4  
5 2 original version is “these days”, which was translated into a corresponding word in Swedish.  
6  
7  
8  
9 3

#### 10 11 4 **DISCUSSION**

12  
13  
14 5 The purpose of this project was to linguistically validate a Swedish version of the Dyspnoea-  
15  
16 6 12 instrument. The procedure was performed according to international guidelines for patient-  
17  
18 7 reported outcomes and have resulted in a convenient instrument for the quantification of  
19  
20 8 different aspects of breathlessness in Swedish research. The instrument could be used as a  
21  
22 9 brief and easy-to use alternative or complement to the instrument Multi-Dimensional Profile  
23  
24 10 (MDP) (13, 28).  
25  
26  
27

28 11 A major strength of our study was the structured multi-stage process in accordance with  
29  
30 12 international guidelines, including translation two independent certified translators, backward  
31  
32 13 translation for quality check, and clinicians’ and patients’ evaluations before establishing the  
33  
34 14 final translation. Moreover, the Swedish version of the Dyspnoea-12 will enable the  
35  
36 15 comparison and aggregation of results from different populations and countries, and the  
37  
38 16 development of further research needed to value the impact of different dimensions of  
39  
40 17 breathlessness. However, the translated version of the Dyspnoea-12 needs to be  
41  
42 18 psychometrically validated in a clinical Swedish population. In addition, further linguistic  
43  
44 19 validations in other languages would be of value and much welcome to develop multinational  
45  
46 20 research.  
47  
48  
49  
50

51 21

#### 52 53 54 22 **Use of the Dyspnoea-12**

1  
2  
3 1 The developer of the Dyspnoea-12 recommends that the instrument should not be used with  
4  
5 2 more than three missing items. The idea is to get a general perception of the current state, and  
6  
7 3 thus the term “these days” is suggested. However, the English version of the Dyspnoea-12 has  
8  
9 4 been used with a recall period of “ the recent two weeks” (Marie Williams, personal  
10  
11 5 communication), and the Swedish version also need to be validated for different periods of  
12  
13 6 time. The Dyspnoea-12 is copyrighted by the developers but can be used free of charge for  
14  
15 7 not industry-funded research, after permission.  
16  
17  
18  
19  
20  
21  
22  
23  
24

8

## 9 **Conclusion**

10 A Swedish version of the Dyspnoea-12 is now available for clinical validation and  
11  
12 multidimensional measurement across diseases and settings with the aim of improved  
13  
14 evaluation and management of dyspnoea.  
15  
16  
17  
18  
19  
20  
21  
22  
23  
24

13

## 14 **AUTHOR'S CONTRIBUTIONS**

15 Conception and design: ME. First draft: JS. Participated in the translation and validation,  
16  
17 revision for important intellectual content, and approval of the version to be published: JS and  
18  
19 ME.  
20  
21  
22  
23  
24

18

## 19 **ACKNOWLEDGEMENTS**

20 The authors thank Bengt Dahlander, MD, Capio ASIH Nacka, who contributed to the clinical  
21  
22 review of the Dyspnoea-12.  
23  
24

22

## FUNDING

The study was supported by an unrestricted grant from the Swedish Heart-Lung Foundation (Nr 20150424).

## REFERENCES

1. Bestall JC, Paul EA, Garrod R, Garnham R, Jones PW, Wedzicha JA. Usefulness of the Medical Research Council (MRC) dyspnoea scale as a measure of disability in patients with chronic obstructive pulmonary disease. *Thorax*. 1999;54(7):581-6.
2. Nishiyama O, Taniguchi H, Kondoh Y, Kimura T, Ogawa T, Watanabe F, et al. Health-related quality of life in patients with idiopathic pulmonary fibrosis. What is the main contributing factor? *Respiratory medicine*. 2005;99(4):408-14.
3. Nishimura K, Izumi T, Tsukino M, Oga T. Dyspnea is a better predictor of 5-year survival than airway obstruction in patients with COPD. *Chest*. 2002;121(5):1434-40.
4. Casanova C, Marin JM, Martinez-Gonzalez C, de Lucas-Ramos P, Mir-Viladrich I, Cosio B, et al. Differential effect of mMRC dyspnea, CAT and CCQ for symptom evaluation within the new GOLD staging and mortality in COPD. *Chest*. 2015.
5. Mura M, Porretta MA, Bargagli E, Sergiacomi G, Zompatori M, Sverzellati N, et al. Predicting survival in newly diagnosed idiopathic pulmonary fibrosis: a 3-year prospective study. *The European respiratory journal*. 2012;40(1):101-9.
6. Nishiyama O, Taniguchi H, Kondoh Y, Kimura T, Kato K, Kataoka K, et al. A simple assessment of dyspnoea as a prognostic indicator in idiopathic pulmonary fibrosis. *The European respiratory journal*. 2010;36(5):1067-72.
7. Ekman I, Cleland JG, Swedberg K, Charlesworth A, Metra M, Poole-Wilson PA. Symptoms in patients with heart failure are prognostic predictors: insights from COMET. *Journal of cardiac failure*. 2005;11(4):288-92.
8. Johnson MJ, Currow DC, Booth S. Prevalence and assessment of breathlessness in the clinical setting. *Expert review of respiratory medicine*. 2014;8(2):151-61.
9. Mahler DA, Wells CK. Evaluation of clinical methods for rating dyspnea. *Chest*. 1988;93(3):580-6.
10. Lansing RW, Moosavi SH, Banzett RB. Measurement of dyspnea: word labeled visual analog scale vs. verbal ordinal scale. *Respiratory physiology & neurobiology*. 2003;134(2):77-83.
11. Borg GA. Psychophysical bases of perceived exertion. *Medicine and science in sports and exercise*. 1982;14(5):377-81.
12. Parshall MB, Schwartzstein RM, Adams L, Banzett RB, Manning HL, Bourbeau J, et al. An official American Thoracic Society statement: update on the mechanisms, assessment, and management of dyspnea. *American journal of respiratory and critical care medicine*. 2012;185(4):435-52.
13. Banzett RB, O'Donnell CR, Guilfoyle TE, Parshall MB, Schwartzstein RM, Meek PM, et al. Multidimensional Dyspnea Profile: an instrument for clinical and laboratory research. *The European respiratory journal*. 2015;45(6):1681-91.
14. Yorke J, Moosavi SH, Shuldham C, Jones PW. Quantification of dyspnoea using descriptors: development and initial testing of the Dyspnoea-12. *Thorax*. 2010;65(1):21-6.



15. Yorke J, Swigris J, Russell AM, Moosavi SH, Ng Man Kwong G, Longshaw M, et al. Dyspnea-12 is a valid and reliable measure of breathlessness in patients with interstitial lung disease. *Chest*. 2011;139(1):159-64.
16. Alyami MM, Jenkins SC, Lababidi H, Hill K. Reliability and validity of an arabic version of the dyspnea-12 questionnaire for Saudi nationals with chronic obstructive pulmonary disease. *Ann Thorac Med*. 2015;10(2):112-7.
17. Yorke J, Russell AM, Swigris J, Shuldham C, Haigh C, Rochnia N, et al. Assessment of dyspnea in asthma: validation of The Dyspnea-12. *The Journal of asthma : official journal of the Association for the Care of Asthma*. 2011;48(6):602-8.
18. Yorke J, Armstrong I. The assessment of breathlessness in pulmonary arterial hypertension: reliability and validity of the Dyspnoea-12. *European journal of cardiovascular nursing : journal of the Working Group on Cardiovascular Nursing of the European Society of Cardiology*. 2014;13(6):506-14.
19. Lee BY, Lee S, Lee JS, Song JW, Lee SD, Jang SH, et al. Validity and Reliability of CAT and Dyspnea-12 in Bronchiectasis and Tuberculous Destroyed Lung. *Tuberculosis and respiratory diseases*. 2012;72(6):467-74.
20. Al-Gamal E, Yorke J, Al-Shwaiyat MK. Dyspnea-12-Arabic: testing of an instrument to measure breathlessness in Arabic patients with chronic obstructive pulmonary disease. *Heart & lung : the journal of critical care*. 2014;43(3):244-8.
21. Tanaka K, Akechi T, Okuyama T, Nishiwaki Y, Uchitomi Y. Development and validation of the Cancer Dyspnoea Scale: a multidimensional, brief, self-rating scale. *British journal of cancer*. 2000;82(4):800-5.
22. Hensch I, Bergman B, Gaston-Johansson F. Validation of a Swedish version of the Cancer Dyspnea Scale. *Journal of pain and symptom management*. 2006;31(4):353-61.
23. Ekström M, Sundh J. Swedish translation and linguistic validation of the multidimensional dyspnoea profile. *European clinical respiratory journal*. 2016;3.
24. Yorke J, Lloyd-Williams M, Smith J, Blackhall F, Harle A, Warden J, et al. Management of the respiratory distress symptom cluster in lung cancer: a randomised controlled feasibility trial. *Supportive care in cancer : official journal of the Multinational Association of Supportive Care in Cancer*. 2015;23(11):3373-84.
25. Wild D, Grove A, Martin M, Eremenco S, McElroy S, Verjee-Lorenz A, et al. Principles of Good Practice for the Translation and Cultural Adaptation Process for Patient-Reported Outcomes (PRO) Measures: report of the ISPOR Task Force for Translation and Cultural Adaptation. *Value in health : the journal of the International Society for Pharmacoeconomics and Outcomes Research*. 2005;8(2):94-104.
26. Wild D, Eremenco S, Mear I, Martin M, Houchin C, Gawlicki M, et al. Multinational trials-recommendations on the translations required, approaches to using the same language in different countries, and the approaches to support pooling the data: the ISPOR Patient-Reported Outcomes Translation and Linguistic Validation Good Research Practices Task Force report. *Value in health : the journal of the International Society for Pharmacoeconomics and Outcomes Research*. 2009;12(4):430-40.
27. Mapigroup 2016. Available from: <http://mapigroup.com/>.
28. Morelot-Panzini C, Gilet H, Aguilaniu B, Devillier P, Didier A, Perez T, et al. Real-life assessment of the multidimensional nature of dyspnoea in COPD outpatients. *The European respiratory journal*. 2016;47(6):1668-79.

1  
2  
3  
4  
5  
6  
7  
8  
9  
10  
11  
12  
13  
14  
15  
16  
17  
18  
19  
20  
21  
22  
23  
24  
25  
26  
27  
28  
29  
30  
31  
32  
33  
34  
35  
36  
37  
38  
39  
40  
41  
42  
43  
44  
45  
46  
47  
48  
49  
50  
51  
52  
53  
54  
55  
56  
57  
58  
59  
60

**Figure legends (only captions needed)**

**Figure 1. Flow chart for the linguistic validation process**

**Figure 2. Swedish version of the Dyspnoea-12**

For peer review only

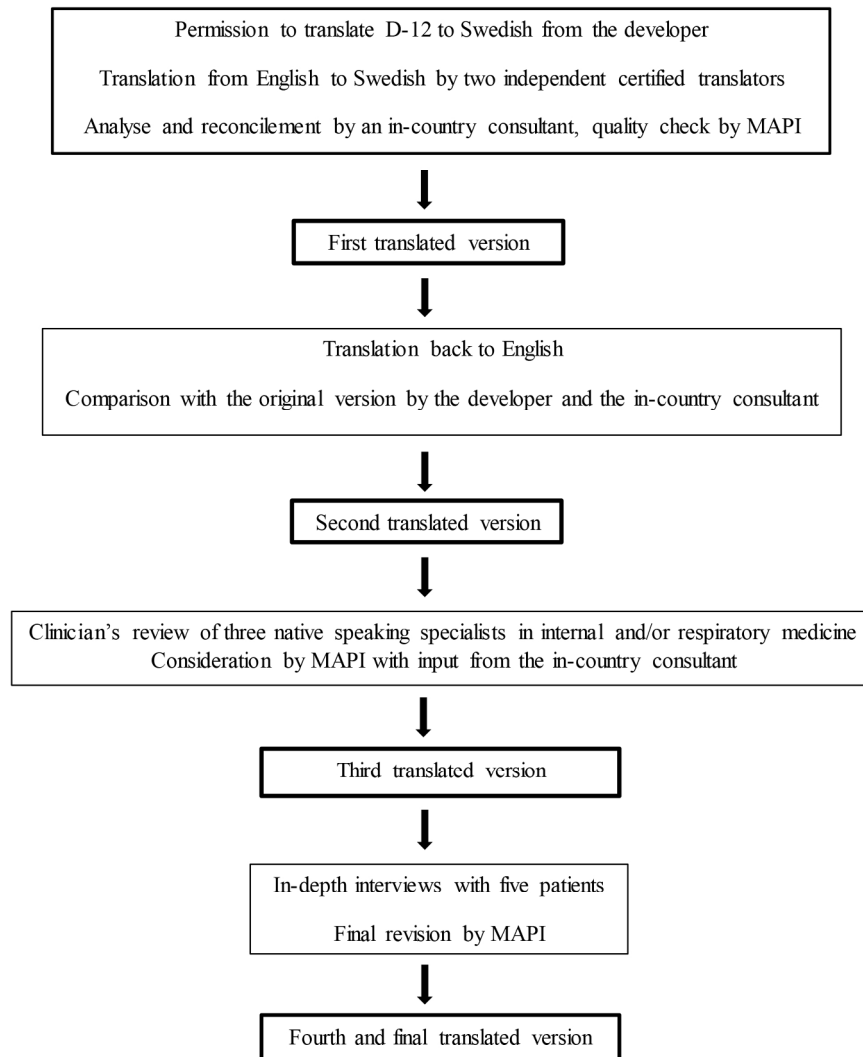

**Flow chart for the linguistic validation process**

166x226mm (300 x 300 DPI)

1  
2  
3  
4  
5  
6  
7  
8  
9  
10  
11  
12  
13  
14  
15  
16  
17  
18  
19  
20  
21  
22  
23  
24  
25  
26  
27  
28  
29  
30  
31  
32  
33  
34  
35  
36  
37  
38  
39  
40  
41  
42  
43  
44  
45  
46  
47  
48  
49  
50  
51  
52  
53  
54  
55  
56  
57  
58  
59  
60



**University of Salford**  
A Greater Manchester University

Royal Brompton & Harefield  
NHS Foundation Trust



# Dyspné-12

**Detta frågeformulär är utformat för att hjälpa oss att ta reda på mer om hur din andning besvärar dig.**

Läs varje påstående och kryssa sedan i den ruta som bäst stämmer överens med din andning överlag **på senare tid**. Om du inte upplever ett symptom, kryssa i rutan "Upplever inte alls". Vänligen svara på alla påståendena.

Namn: ..... ID: ..... Datum: .... /.... /....

| Påstående                                     | Upplever inte alls | Lindrigt | Måttligt | Svårt |
|-----------------------------------------------|--------------------|----------|----------|-------|
| 1. Jag kan inte ta djupa andetag              |                    |          |          |       |
| 2. Min andning är ansträngande                |                    |          |          |       |
| 3. Jag känner mig andfädd                     |                    |          |          |       |
| 4. Jag har svårt att hämta andan              |                    |          |          |       |
| 5. Jag får inte tillräckligt med luft         |                    |          |          |       |
| 6. Min andning är obehaglig                   |                    |          |          |       |
| 7. Min andning är utmattande                  |                    |          |          |       |
| 8. Min andning får mig att känna mig nedstämd |                    |          |          |       |
| 9. Min andning får mig att känna mig olycklig |                    |          |          |       |
| 10. Min andning är bekymmersam                |                    |          |          |       |
| 11. Min andning gör mig uppstressad           |                    |          |          |       |
| 12. Min andning är besvärande                 |                    |          |          |       |

© Royal Brompton and Harefield Trust, London and University of Salford, Greater Manchester, alla rättigheter förbehålls

D-12 - Sw eden/Swedish- Version of 24 Feb 16 - Mapi.  
ID05902 / D-12\_AU10\_swe-SE.doc

### Swedish version of the Dyspnoea-12

210x297mm (300 x 300 DPI)

## STROBE Statement—checklist of items that should be included in reports of observational studies

|                              | Item No | Recommendation                                                                                                                                                                                                                                                                                                                                                                                                                                                                       |
|------------------------------|---------|--------------------------------------------------------------------------------------------------------------------------------------------------------------------------------------------------------------------------------------------------------------------------------------------------------------------------------------------------------------------------------------------------------------------------------------------------------------------------------------|
| <b>Title and abstract</b>    | 1       | (a) Indicate the study's design with a commonly used term in the title or the abstract<br><i>Yes</i>                                                                                                                                                                                                                                                                                                                                                                                 |
|                              |         | (b) Provide in the abstract an informative and balanced summary of what was done and what was found<br><i>Yes</i>                                                                                                                                                                                                                                                                                                                                                                    |
| <b>Introduction</b>          |         |                                                                                                                                                                                                                                                                                                                                                                                                                                                                                      |
| Background/rationale         | 2       | Explain the scientific background and rationale for the investigation being reported<br><i>Yes</i>                                                                                                                                                                                                                                                                                                                                                                                   |
| Objectives                   | 3       | State specific objectives, including any prespecified hypotheses<br><i>Yes</i>                                                                                                                                                                                                                                                                                                                                                                                                       |
| <b>Methods</b>               |         |                                                                                                                                                                                                                                                                                                                                                                                                                                                                                      |
| Study design                 | 4       | Present key elements of study design early in the paper<br><i>Yes</i>                                                                                                                                                                                                                                                                                                                                                                                                                |
| Setting                      | 5       | Describe the setting, locations, and relevant dates, including periods of recruitment, exposure, follow-up, and data collection<br><i>Yes</i>                                                                                                                                                                                                                                                                                                                                        |
| Participants                 | 6       | (a) <i>Cohort study</i> —Give the eligibility criteria, and the sources and methods of selection of participants. Describe methods of follow-up<br><i>Case-control study</i> —Give the eligibility criteria, and the sources and methods of case ascertainment and control selection. Give the rationale for the choice of cases and controls<br><i>Cross-sectional study</i> —Give the eligibility criteria, and the sources and methods of selection of participants<br><i>N/A</i> |
|                              |         | (b) <i>Cohort study</i> —For matched studies, give matching criteria and number of exposed and unexposed<br><i>Case-control study</i> —For matched studies, give matching criteria and the number of controls per case<br><i>N/A</i>                                                                                                                                                                                                                                                 |
| Variables                    | 7       | Clearly define all outcomes, exposures, predictors, potential confounders, and effect modifiers. Give diagnostic criteria, if applicable<br><i>Yes</i>                                                                                                                                                                                                                                                                                                                               |
| Data sources/<br>measurement | 8*      | For each variable of interest, give sources of data and details of methods of assessment (measurement). Describe comparability of assessment methods if there is more than one group<br><i>Yes</i>                                                                                                                                                                                                                                                                                   |
| Bias                         | 9       | Describe any efforts to address potential sources of bias<br><i>Yes</i>                                                                                                                                                                                                                                                                                                                                                                                                              |
| Study size                   | 10      | Explain how the study size was arrived at<br><i>N/A</i>                                                                                                                                                                                                                                                                                                                                                                                                                              |
| Quantitative variables       | 11      | Explain how quantitative variables were handled in the analyses. If applicable, describe which groupings were chosen and why<br><i>N/A</i>                                                                                                                                                                                                                                                                                                                                           |

Statistical methods

12 (a) Describe all statistical methods, including those used to control for confounding

Yes

(b) Describe any methods used to examine subgroups and interactions

N/A

(c) Explain how missing data were addressed

N/A(d) *Cohort study*—If applicable, explain how loss to follow-up was addressed*Case-control study*—If applicable, explain how matching of cases and controls was addressed*Cross-sectional study*—If applicable, describe analytical methods taking account of sampling strategyN/A

(e) Describe any sensitivity analyses

N/A

Continued on next page

For peer review only

**Results**

|                  |     |                                                                                                                                                                                                                            |
|------------------|-----|----------------------------------------------------------------------------------------------------------------------------------------------------------------------------------------------------------------------------|
| Participants     | 13* | (a) Report numbers of individuals at each stage of study—eg numbers potentially eligible, examined for eligibility, confirmed eligible, included in the study, completing follow-up, and analysed<br><i>N/A</i>            |
|                  |     | (b) Give reasons for non-participation at each stage<br><i>N/A</i>                                                                                                                                                         |
|                  |     | (c) Consider use of a flow diagram<br><i>Yes</i>                                                                                                                                                                           |
| Descriptive data | 14* | (a) Give characteristics of study participants (eg demographic, clinical, social) and information on exposures and potential confounders<br><i>N/A</i>                                                                     |
|                  |     | (b) Indicate number of participants with missing data for each variable of interest<br><i>N/A</i>                                                                                                                          |
|                  |     | (c) <i>Cohort study</i> —Summarise follow-up time (eg, average and total amount)<br><i>N/A</i>                                                                                                                             |
| Outcome data     | 15* | <i>Cohort study</i> —Report numbers of outcome events or summary measures over time                                                                                                                                        |
|                  |     | <i>Case-control study</i> —Report numbers in each exposure category, or summary measures of exposure                                                                                                                       |
|                  |     | <i>Cross-sectional study</i> —Report numbers of outcome events or summary measures<br><i>Yes</i>                                                                                                                           |
| Main results     | 16  | (a) Give unadjusted estimates and, if applicable, confounder-adjusted estimates and their precision (eg, 95% confidence interval). Make clear which confounders were adjusted for and why they were included<br><i>N/A</i> |
|                  |     | (b) Report category boundaries when continuous variables were categorized<br><i>N/A</i>                                                                                                                                    |
|                  |     | (c) If relevant, consider translating estimates of relative risk into absolute risk for a meaningful time period<br><i>N/A</i>                                                                                             |
| Other analyses   | 17  | Report other analyses done—eg analyses of subgroups and interactions, and sensitivity analyses<br><i>Yes</i>                                                                                                               |

**Discussion**

|                  |    |                                                                                                                                                                                          |
|------------------|----|------------------------------------------------------------------------------------------------------------------------------------------------------------------------------------------|
| Key results      | 18 | Summarise key results with reference to study objectives<br><i>Yes</i>                                                                                                                   |
| Limitations      | 19 | Discuss limitations of the study, taking into account sources of potential bias or imprecision. Discuss both direction and magnitude of any potential bias<br><i>Yes</i>                 |
| Interpretation   | 20 | Give a cautious overall interpretation of results considering objectives, limitations, multiplicity of analyses, results from similar studies, and other relevant evidence<br><i>Yes</i> |
| Generalisability | 21 | Discuss the generalisability (external validity) of the study results<br><i>Yes</i>                                                                                                      |

**Other information**

|         |    |                                                                                                  |
|---------|----|--------------------------------------------------------------------------------------------------|
| Funding | 22 | Give the source of funding and the role of the funders for the present study and, if applicable, |
|---------|----|--------------------------------------------------------------------------------------------------|

1  
2 for the original study on which the present article is based

3 *Yes*

4  
5 \*Give information separately for cases and controls in case-control studies and, if applicable, for exposed and  
6 unexposed groups in cohort and cross-sectional studies.  
7

8  
9 **Note:** An Explanation and Elaboration article discusses each checklist item and gives methodological background and  
10 published examples of transparent reporting. The STROBE checklist is best used in conjunction with this article (freely  
11 available on the Web sites of PLoS Medicine at <http://www.plosmedicine.org/>, Annals of Internal Medicine at  
12 <http://www.annals.org/>, and Epidemiology at <http://www.epidem.com/>). Information on the STROBE Initiative is  
13 available at [www.strobe-statement.org](http://www.strobe-statement.org).  
14  
15  
16  
17  
18  
19  
20  
21  
22  
23  
24  
25  
26  
27  
28  
29  
30  
31  
32  
33  
34  
35  
36  
37  
38  
39  
40  
41  
42  
43  
44  
45  
46  
47  
48  
49  
50  
51  
52  
53  
54  
55  
56  
57  
58  
59  
60



# BMJ Open

## Dyspnoea-12: A translation and linguistic validation study in a Swedish setting

|                                 |                                                                                                                      |
|---------------------------------|----------------------------------------------------------------------------------------------------------------------|
| Journal:                        | <i>BMJ Open</i>                                                                                                      |
| Manuscript ID                   | bmjopen-2016-014490.R2                                                                                               |
| Article Type:                   | Research                                                                                                             |
| Date Submitted by the Author:   | 09-Mar-2017                                                                                                          |
| Complete List of Authors:       | Sundh, Josefin; School of medical Sciences, Örebro University, Department of Respiratory Medicine<br>Ekström, Magnus |
| <b>Primary Subject Heading</b>: | Respiratory medicine                                                                                                 |
| Secondary Subject Heading:      | Research methods                                                                                                     |
| Keywords:                       | dyspnoea, multidimensional, measurement, Swedish, translation                                                        |
|                                 |                                                                                                                      |

SCHOLARONE™  
Manuscripts

Peer review only

1  
2  
3 **Title: Dyspnoea-12: A translation and linguistic validation study in a**  
4  
5 **Swedish setting**  
6  
7

8  
9 **Running title: Swedish version of D-12**  
10

11 **Authors:** Josefin Sundh, MD, PhD<sup>1</sup>, Magnus Ekström, MD, PhD<sup>2</sup>  
12

13  
14 <sup>1</sup> *Department of Respiratory Medicine, School of Medical Sciences, Örebro University,*  
15 *Örebro, Sweden.*  
16  
17

18  
19 <sup>2</sup> *Department of Clinical Sciences, Division of Respiratory Medicine & Allergology, Lund*  
20 *University, Lund, Sweden*  
21  
22

23  
24  
25  
26  
27 **Corresponding author:** Josefin Sundh, Department of Respiratory Medicine, School of  
28  
29 Medical Sciences, Örebro University, Örebro, Sweden, E-mail [josefin.sundh@oru.se](mailto:josefin.sundh@oru.se), Phone  
30  
31 +46702349517, Fax +4619186526  
32  
33

34  
35  
36  
37 **Word count for body of text:** 1544  
38

39  
40 **Word count for abstract:** 201  
41

42  
43 **Tables:** 0; **Figures:** 2.  
44

45  
46 **Key words:** Dyspnoea; multidimensional, measurement, Swedish, translation  
47  
48  
49  
50  
51  
52  
53  
54  
55  
56  
57  
58  
59  
60

## ABSTRACT

**Background:** Dyspnoea consists of multiple dimensions including the intensity, unpleasantness, sensory qualities and emotional responses which may differ between patient groups, settings and in relation to treatment. The Dyspnoea-12 is a validated and convenient instrument for multidimensional measurement in English. We aimed to take forward a Swedish version of the Dyspnoea-12.

**Methods:** The linguistic validation of the Dyspnoea-12 was performed (Mapi Language Services, Lyon, France). The standardised procedure involved forward and backward translations by three independent certified translators, and revisions after feedback from an in-country linguistic consultant, the developers, and three native physicians. The understanding and convenience of the translated version was evaluated using qualitative in-depth interviews with five patients with dyspnoea.

**Results:** A Swedish version of the Dyspnoea-12 was elaborated and evaluated carefully according to international guidelines. The Swedish version; “Dyspné-12”, has the same layout as the original version, including 12 items distributed on seven physical and five affective items. The Dyspnoea-12 is copyrighted by the developer but can be used free of charge after permission for not industry-funded research.

**Conclusion:** A Swedish version of the Dyspnoea-12 is now available for clinical validation and multidimensional measurement across diseases and settings with the aim of improved evaluation and management of dyspnoea.

## Article Summary

### Strengths and limitations of this study

- The linguistic validation of the Dyspnoea-12 to Swedish was performed using a structured multi-stage process in accordance with international guidelines, involving translations by two independent certified translators, a backward translation for quality check, and review by clinicians and test on patients with dyspnoea before establishing the final Swedish version
- A Swedish version of the Dyspnoea-12 will enable to conduct clinical validation studies across patient populations and settings, and will bring a new possibility to deepen the understanding of breathlessness and to value the impact of different dimensions of breathlessness.
- The translated version of the Dyspnoea-12 still needs to be psychometrically validated in a clinical Swedish population.

## 1 INTRODUCTION

2 Reduction of symptoms is a major treatment goal in chronic cardiac and respiratory diseases.  
3 Dyspnoea is the cardinal symptom in cardiopulmonary diseases, including heart failure,  
4 chronic obstructive pulmonary disease (COPD) and interstitial lung diseases such as  
5 idiopathic pulmonary fibrosis (IPF). Dyspnoea is strongly associated with impaired health  
6 related quality of life in COPD (1) and IPF (2), and with increased mortality in COPD (3, 4),  
7 IPF (5, 6) and heart failure (7). Despite this fact, clinical practice often focuses on underlying  
8 diseases and not on the management of the often chronic symptom of dyspnoea itself (8).

### 10 **Multiple dimensions of dyspnoea**

11 Traditionally, dyspnoea has been assessed as an indirect measure of functional limitation due  
12 to breathlessness, as with the Medical Research Council (MRC) scale (9), or using a single  
13 rating scale such as a visual analogue scale (VAS) (10) or Borg scale (11) during exercise  
14 tests. However, growing attention has been paid to the fact that dyspnoea consists of multiple  
15 important dimensions besides the overall intensity or unpleasantness, such as sensory and  
16 affective qualities, associated emotional responses, and the functional impact on the person's  
17 life (12). This makes it difficult to compare findings between patient populations and between  
18 differences in responses of separate treatments of dyspnoea (13). Thus, standardised  
19 measurements with different dimensions of dyspnoea are needed.

### 21 **Dyspnoea-12**

22 The Dyspnoea-12 instrument was developed to be a concise instrument for quantification of  
23 different aspects of dyspnoea, valid across different cardiorespiratory diseases (14). In the

1  
2  
3 1 original study establishing the final version of the Dyspnoea-12, the instrument was  
4  
5 2 associated with the MRC scale in COPD, IPF and heart failure (14). The subsequent  
6  
7 3 validation study showed a good internal reliability and test-retest reliability, and the  
8  
9 4 Dyspnoea-12 was significantly correlated to the Hospital Anxiety and Depression Scale  
10  
11 5 (HADS), the MRC scale, the Forced Expiratory Volume in one second (FEV<sub>1</sub>) and the six  
12  
13 6 minutes walking distance (6MWD) test (14). After the initial validation, further studies have  
14  
15 7 validated the use of the Dyspnoea-12 in interstitial lung disease (15) and COPD (16), but also  
16  
17 8 in asthma (17), pulmonary arterial hypertension (18), bronchiectasis and tuberculosis  
18  
19 9 destroyed lungs (19).

20  
21  
22  
23  
24 10 The Dyspnoea-12 is available in English (14), Arabic (16, 20) and Korean (19), but has to  
25  
26 11 our knowledge not been translated into any other European language except English. A  
27  
28 12 multidimensional instrument for assessment of dyspnoea in cancer, the Cancer Dyspnoea  
29  
30 13 Scale, has been developed (21) and validated in Swedish (22), and recently the  
31  
32 14 Multidimensional Dyspnoea Profile (13) has been linguistically validated in Swedish (23).  
33  
34 15 However, a brief and convenient multidimensional instrument that allows comparison across  
35  
36 16 diseases would be of additional value. Until now, there has been no multidimensional  
37  
38 17 instrument for measurement of dyspnoea available in Swedish. A Swedish version of  
39  
40 18 Dyspnoea-12 should be of great importance for further research in the field of breathlessness,  
41  
42 19 especially to be able to make comparisons across populations. We therefore aimed to develop  
43  
44 20 a linguistically validated Swedish version of the Dyspnoea-12.  
45  
46  
47  
48

49  
50  
51

## 52 **METHODS**

### 53 54 55 23 **The Dyspnoea-12 instrument** 56 57 58 59 60

1  
2  
3 1 The Dyspnoea-12 instrument includes 12 descriptors assessed on a four-point scale such as  
4  
5 2 none (score 0), mild (1), moderate (2) or severe (3), resulting in a total score from 0 to 36  
6  
7 3 where a higher score corresponds to more severe breathlessness. The first seven items  
8  
9 4 constitute a physical domain assessing whether the breath does not go in all the way, the  
10  
11 5 patient cannot get enough air, feels short of breath or has difficulty catching breath, and the  
12  
13 6 breathing requires more work, is uncomfortable or exhausting. The remaining five items  
14  
15 7 constitute an emotional domain where the items describe whether the breathing is distressing,  
16  
17 8 irritating or makes the patient feel depressed, miserable or agitated. A physical and an  
18  
19 9 emotional component score can be calculated, with maximum score of 21 and 15,  
20  
21 10 respectively. A minimal important clinical difference (MCID) of 3 units has been  
22  
23 11 recommended (24).  
24  
25  
26  
27  
28  
29  
30

### 31 **Linguistic validation**

32  
33  
34 14 The linguistic validation of the Dyspnoea-12 into Swedish was performed in a structured  
35  
36 15 multi-stage process in accordance with international guidelines (25, 26), in collaboration with  
37  
38 16 a company specialized in translation and validation of patient-reported outcome measures  
39  
40 17 (Mapi Language Services, Lyon, France; hereafter referred to as 'Mapi') (27). Permission to  
41  
42 18 translate the Dyspnoea-12 into Swedish was obtained from the developer. The role of Mapi  
43  
44 19 was to supply translators and to perform quality checks in collaboration with the developer.  
45  
46 20 The whole process is summarised in Figure 1.  
47  
48  
49  
50  
51  
52  
53  
54 22 *Translation*

1  
2  
3 1 Two independent certified translators, native speakers of Swedish and living in Sweden,  
4  
5 2 translated the original instrument developed in British English into Swedish. These two  
6  
7 3 forward-translations were analysed and reconciled by an in-country consultant into a first  
8  
9 4 translated version. After a quality check from Mapi, the first Swedish version was translated  
10  
11 5 back into English and compared with the original British version by the developer and by the  
12  
13 6 in-country consultant, to establish a second translated Swedish version.  
14  
15  
16  
17  
18  
19

#### 20 8 *Clinicians' review*

21  
22  
23 9 The second translated version was reviewed by three native Swedish-speaking specialists in  
24  
25 10 internal and/or respiratory medicine, including the authors of this paper, in order to provide  
26  
27 11 detailed feedback on the wordings from a clinical perspective. The feedback from the  
28  
29 12 clinicians was considered by Mapi again with input from the in-country consultant and the  
30  
31 13 developer, resulting in a third translated Swedish version.  
32  
33  
34  
35  
36  
37

#### 38 15 *Patients' interviews*

39  
40  
41 16 The third translated version was evaluated using a validated method of individual in-depth  
42  
43 17 interviews (27) with five Swedish patients with dyspnoea, recruited by Mapi and the in-  
44  
45 18 country consultant, in order to investigate if the instrument was easy to understand, assimilate  
46  
47 19 and accept. The patients were selected by convenience. No patients denied participating. Data  
48  
49 20 saturation was not discussed, as the number of patients were decided according to Mapi:s  
50  
51 21 guidelines on linguistic validation. Two of the patients were males and three females, and  
52  
53 22 their main conditions were asthma, heart failure or anxiety disorder. The patients were  
54  
55 23 interviewed face-to-face by the local consultant, and the interviews took place at the  
56  
57  
58  
59  
60



1  
2  
3 1 consultant's office during the 7<sup>th</sup> to 10<sup>th</sup> of August 2015. The consultant was female, her  
4  
5 2 occupation was physiotherapist, and she had 20 years of experience of patient interviews. The  
6  
7 3 consultant had no personal relationship to the patients and no bias to report to the patients  
8  
9 4 before the interviews. No one else except the consultant and the patient was present during the  
10  
11 5 interviews. The patients were asked to complete the questionnaire and subsequently make  
12  
13 6 general comments and answer two specific questions for each item. They were told that the  
14  
15 7 intention was to assess whether the questionnaire was comprehensible and acceptable for  
16  
17 8 them, but not to evaluate their answers to the items. The first question was "What does the  
18  
19 9 instructions/question/response choice mean for you?", and encouraged the respondents to  
20  
21 10 reword the item using other words that those used or to give examples. The second question  
22  
23 11 was "Did you have difficulty understanding the instructions/question/response choice?", and  
24  
25 12 also included follow-up questions if there were words that were difficult to understand and  
26  
27 13 suggested changes of the wording. The patients were encouraged to speak and to express their  
28  
29 14 feelings about the questions without being interrupted. The consultant was attentive to any  
30  
31 15 non-verbal or verbal signs betraying the way the respondents felt. The interviews took  
32  
33 16 approximately one hour each, and were transcribed verbatim. Notes were made by hand in  
34  
35 17 Swedish and translated to English after the interviews. No audio recording was used. The  
36  
37 18 transcripts of the interviews were not returned to the patients and the interviews were not  
38  
39 19 repeated. The feedback from the patients on their understanding and suggested alternative  
40  
41 20 formulations for each item was used for revision and establishment of the final linguistically  
42  
43 21 validated translation. As the purpose of the interviews was only to test the understanding of  
44  
45 22 the Swedish version of Dyspnoea-12, the results of the interviews were not coded or presented  
46  
47 23 in themes or using quotations. The questions used in the interviews were pilot tested in the  
48  
49 24 original English version.  
50  
51  
52  
53  
54  
55  
56  
57  
58  
59  
60

## 1 **Ethics**

2 The study was approved by the regional ethics committee at Lund University (DNr: 2016/16).  
3 Written informed consent for the translation process and clinicians' review was not required  
4 as no personal data on participants were collected. Oral consent was received from the five  
5 patients for the in-depth interviews.  
6

## 7 **RESULTS**

8 The final certified, linguistically validated Swedish translation of the Dyspnoea-12 is found in  
9 Figure 2. The Swedish version; "Dyspné-12", has the same layout as the original version,  
10 including 12 items. The clinicians review resulted in several small linguistic adjustments,  
11 after which the instrument was conceptually equivalent to the original but uses the  
12 corresponding adequate clinical words and expressions in Swedish. The in-depth interviews  
13 with five patients did not result in any further changes. The time period of measurement in the  
14 original version is "these days", which was translated into a corresponding word in Swedish.  
15

## 16 **DISCUSSION**

17 The purpose of this project was to linguistically validate a Swedish version of the Dyspnoea-  
18 12 instrument. The procedure was performed according to international guidelines for patient-  
19 reported outcomes and have resulted in a convenient instrument for the quantification of  
20 different aspects of breathlessness in Swedish research. The instrument could be used as a  
21 brief and easy-to use alternative or complement to the instrument Multi-Dimensional Profile  
22 (MDP) (13, 28).

1  
2  
3 1 A major strength of our study was the structured multi-stage process in accordance with  
4  
5 2 international guidelines, including translation two independent certified translators, backward  
6  
7 3 translation for quality check, and clinicians' and patients' evaluations before establishing the  
8  
9 4 final translation. Moreover, the Swedish version of the Dyspnoea-12 will enable the  
10  
11 5 comparison and aggregation of results from different populations and countries, and the  
12  
13 6 development of further research needed to value the impact of different dimensions of  
14  
15 7 breathlessness.

16  
17  
18  
19 8 A limitation of the study is that the evaluation of the translated instrument was limited to a  
20  
21 9 smaller number of clinicians and patients. The linguistic validation was performed in  
22  
23 10 accordance with international guidelines, but we cannot exclude the possibility that an  
24  
25 11 evaluation in a larger population could have identified a need to change some of the wordings  
26  
27 12 in the Swedish translation. However, the aim of the present evaluation was to explore if the  
28  
29 13 wordings were comprehensible, not to validate the wordings per se. The translated version of  
30  
31 14 the Dyspnoea-12 also needs to be psychometrically validated in a clinical Swedish population.  
32  
33 15 In addition, linguistic validations in other languages would be of value and much welcome to  
34  
35 16 develop multinational research.

### 36 37 38 39 40 41 42 43 18 **Use of the Dyspnoea-12**

44  
45  
46 19 The developer of the Dyspnoea-12 recommends that the instrument should not be used with  
47  
48 20 more than three missing items. The idea is to get a general perception of the current state, and  
49  
50 21 thus the term "these days" is suggested. However, the English version of the Dyspnoea-12 has  
51  
52 22 been used with a recall period of "the recent two weeks" (29), and the Swedish version also  
53  
54 23 need to be validated for different periods of time. The Dyspnoea-12 is copyrighted by the  
55  
56 24 developers but can be used free of charge for not industry-funded research, after permission.

1  
2  
3 1  
4  
56 2 **Conclusion**

7  
8  
9 3 A Swedish version of the Dyspnoea-12 is now available for clinical validation and  
10  
11 4 multidimensional measurement across diseases and settings with the aim of improved  
12  
13 5 evaluation and management of dyspnoea.  
14  
15

16  
17 6  
1819 7 **AUTHOR'S CONTRIBUTIONS**

20  
21  
22 8 Conception and design: ME. First draft: JS. Participated in the translation and validation,  
23  
24 9 revision for important intellectual content, and approval of the version to be published: JS and  
25  
26  
27 10 ME.  
28  
29

30  
31 11  
3233 12 **ACKNOWLEDGEMENTS**

34  
35  
36 13 The authors thank Bengt Dahlander, MD, Capio ASIH Nacka, who contributed to the clinical  
37  
38 14 review of the Dyspnoea-12.  
39  
40

41  
42 15  
4344 16 **DISCLOSURE STATEMENT**

45  
46  
47 17 The authors have no financial or other competing interests related to the material of the  
48  
49 18 present study.  
50  
51

52  
53 19  
5455 **FUNDING**  
56  
57  
58  
59  
60

1 The study was supported by an unrestricted grant from the Swedish Heart-Lung Foundation  
2 (Nr 20150424).

#### 4 DATA SHARING STATEMENT

5 Data available from the Dryad Digital Repository: <http://dx.doi.org/10.5061/dryad.sd879>

#### 21 REFERENCES

1. Bestall JC, Paul EA, Garrod R, Garnham R, Jones PW, Wedzicha JA. Usefulness of the Medical Research Council (MRC) dyspnoea scale as a measure of disability in patients with chronic obstructive pulmonary disease. *Thorax*. 1999;54(7):581-6.
2. Nishiyama O, Taniguchi H, Kondoh Y, Kimura T, Ogawa T, Watanabe F, et al. Health-related quality of life in patients with idiopathic pulmonary fibrosis. What is the main contributing factor? *Respiratory medicine*. 2005;99(4):408-14.
3. Nishimura K, Izumi T, Tsukino M, Oga T. Dyspnea is a better predictor of 5-year survival than airway obstruction in patients with COPD. *Chest*. 2002;121(5):1434-40.
4. Casanova C, Marin JM, Martinez-Gonzalez C, de Lucas-Ramos P, Mir-Viladrich I, Cosio B, et al. Differential effect of mMRC dyspnea, CAT and CCQ for symptom evaluation within the new GOLD staging and mortality in COPD. *Chest*. 2015.
5. Mura M, Porretta MA, Bargagli E, Sergiacomi G, Zompatori M, Sverzellati N, et al. Predicting survival in newly diagnosed idiopathic pulmonary fibrosis: a 3-year prospective study. *The European respiratory journal*. 2012;40(1):101-9.
6. Nishiyama O, Taniguchi H, Kondoh Y, Kimura T, Kato K, Kataoka K, et al. A simple assessment of dyspnoea as a prognostic indicator in idiopathic pulmonary fibrosis. *The European respiratory journal*. 2010;36(5):1067-72.
7. Ekman I, Cleland JG, Swedberg K, Charlesworth A, Metra M, Poole-Wilson PA. Symptoms in patients with heart failure are prognostic predictors: insights from COMET. *Journal of cardiac failure*. 2005;11(4):288-92.
8. Johnson MJ, Currow DC, Booth S. Prevalence and assessment of breathlessness in the clinical setting. *Expert review of respiratory medicine*. 2014;8(2):151-61.
9. Mahler DA, Wells CK. Evaluation of clinical methods for rating dyspnea. *Chest*. 1988;93(3):580-6.
10. Lansing RW, Moosavi SH, Banzett RB. Measurement of dyspnea: word labeled visual analog scale vs. verbal ordinal scale. *Respiratory physiology & neurobiology*. 2003;134(2):77-83.
11. Borg GA. Psychophysical bases of perceived exertion. *Medicine and science in sports and exercise*. 1982;14(5):377-81.
12. Parshall MB, Schwartzstein RM, Adams L, Banzett RB, Manning HL, Bourbeau J, et al. An official American Thoracic Society statement: update on the mechanisms, assessment, and management of dyspnea. *American journal of respiratory and critical care medicine*. 2012;185(4):435-52.

13. Banzett RB, O'Donnell CR, Guilfoyle TE, Parshall MB, Schwartzstein RM, Meek PM, et al. Multidimensional Dyspnea Profile: an instrument for clinical and laboratory research. *The European respiratory journal*. 2015;45(6):1681-91.
14. Yorke J, Moosavi SH, Shuldham C, Jones PW. Quantification of dyspnoea using descriptors: development and initial testing of the Dyspnoea-12. *Thorax*. 2010;65(1):21-6.
15. Yorke J, Swigris J, Russell AM, Moosavi SH, Ng Man Kwong G, Longshaw M, et al. Dyspnea-12 is a valid and reliable measure of breathlessness in patients with interstitial lung disease. *Chest*. 2011;139(1):159-64.
16. Alyami MM, Jenkins SC, Lababidi H, Hill K. Reliability and validity of an arabic version of the dyspnea-12 questionnaire for Saudi nationals with chronic obstructive pulmonary disease. *Ann Thorac Med*. 2015;10(2):112-7.
17. Yorke J, Russell AM, Swigris J, Shuldham C, Haigh C, Rochnia N, et al. Assessment of dyspnea in asthma: validation of The Dyspnea-12. *The Journal of asthma : official journal of the Association for the Care of Asthma*. 2011;48(6):602-8.
18. Yorke J, Armstrong I. The assessment of breathlessness in pulmonary arterial hypertension: reliability and validity of the Dyspnoea-12. *European journal of cardiovascular nursing : journal of the Working Group on Cardiovascular Nursing of the European Society of Cardiology*. 2014;13(6):506-14.
19. Lee BY, Lee S, Lee JS, Song JW, Lee SD, Jang SH, et al. Validity and Reliability of CAT and Dyspnea-12 in Bronchiectasis and Tuberculous Destroyed Lung. *Tuberculosis and respiratory diseases*. 2012;72(6):467-74.
20. Al-Gamal E, Yorke J, Al-Shwaiyat MK. Dyspnea-12-Arabic: testing of an instrument to measure breathlessness in Arabic patients with chronic obstructive pulmonary disease. *Heart & lung : the journal of critical care*. 2014;43(3):244-8.
21. Tanaka K, Akechi T, Okuyama T, Nishiwaki Y, Uchitomi Y. Development and validation of the Cancer Dyspnoea Scale: a multidimensional, brief, self-rating scale. *British journal of cancer*. 2000;82(4):800-5.
22. Henoeh I, Bergman B, Gaston-Johansson F. Validation of a Swedish version of the Cancer Dyspnea Scale. *Journal of pain and symptom management*. 2006;31(4):353-61.
23. Ekström M, Sundh J. Swedish translation and linguistic validation of the multidimensional dyspnoea profile. *European clinical respiratory journal*. 2016;3.
24. Yorke J, Lloyd-Williams M, Smith J, Blackhall F, Harle A, Warden J, et al. Management of the respiratory distress symptom cluster in lung cancer: a randomised controlled feasibility trial. *Supportive care in cancer : official journal of the Multinational Association of Supportive Care in Cancer*. 2015;23(11):3373-84.
25. Wild D, Grove A, Martin M, Eremenco S, McElroy S, Verjee-Lorenz A, et al. Principles of Good Practice for the Translation and Cultural Adaptation Process for Patient-Reported Outcomes (PRO) Measures: report of the ISPOR Task Force for Translation and Cultural Adaptation. *Value in health : the journal of the International Society for Pharmacoeconomics and Outcomes Research*. 2005;8(2):94-104.
26. Wild D, Eremenco S, Mear I, Martin M, Houchin C, Gawlicki M, et al. Multinational trials-recommendations on the translations required, approaches to using the same language in different countries, and the approaches to support pooling the data: the ISPOR Patient-Reported Outcomes Translation and Linguistic Validation Good Research Practices Task Force report. *Value in health : the journal of the International Society for Pharmacoeconomics and Outcomes Research*. 2009;12(4):430-40.
27. Mapigroup 2016. Available from: <http://mapigroup.com/>.
28. Morelot-Panzini C, Gilet H, Aguilaniu B, Devillier P, Didier A, Perez T, et al. Real-life assessment of the multidimensional nature of dyspnoea in COPD outpatients. *The European respiratory journal*. 2016;47(6):1668-79.
29. Williams MT JD, Frith P. Comparison of the Dyspnoea-12 and Multidimensional Dyspnoea Profile in people with COPD. *ERJ* 2017 49: 1600773. 2017.

1  
2  
3  
4  
5  
6  
7 **Figure legends (only captions needed)**  
8  
9

10  
11 **Figure 1. Flow chart for the linguistic validation process**  
12

13  
14  
15 **Figure 2. Swedish version of the Dyspnoea-12**  
16  
17  
18  
19  
20  
21  
22  
23  
24  
25  
26  
27  
28  
29  
30  
31  
32  
33  
34  
35  
36  
37  
38  
39  
40  
41  
42  
43  
44  
45  
46  
47  
48  
49  
50  
51  
52  
53  
54  
55  
56  
57  
58  
59  
60

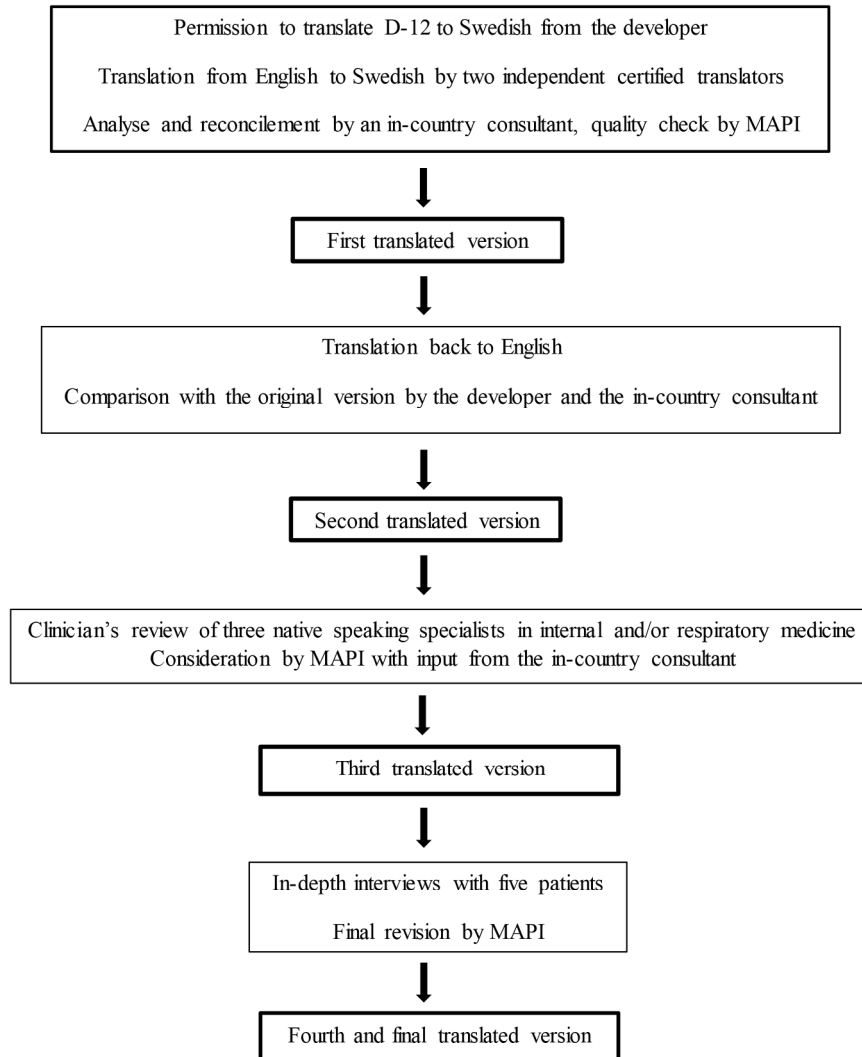

**Flow chart for the linguistic validation process**

166x226mm (300 x 300 DPI)



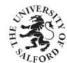

University of Salford  
A Greater Manchester University

Royal Brompton & Harefield **NHS**  
NHS Foundation Trust

# Dyspné-12

Detta frågeformulär är utformat för att hjälpa oss att ta reda på mer om hur din andning besvärar dig.

Läs varje påstående och kryssa sedan i den ruta som bäst stämmer överens med din andning överlag på senare tid. Om du inte upplever ett symptom, kryssa i rutan "Upplever inte alls". Vänligen svara på alla påståendena.

Namn: ..... ID: ..... Datum: .... /.... /....

| Påstående                                     | Upplever inte alls | Lindrigt | Måttligt | Svårt |
|-----------------------------------------------|--------------------|----------|----------|-------|
| 1. Jag kan inte ta djupa andetag              |                    |          |          |       |
| 2. Min andning är ansträngande                |                    |          |          |       |
| 3. Jag känner mig andfädd                     |                    |          |          |       |
| 4. Jag har svårt att hämta andan              |                    |          |          |       |
| 5. Jag får inte tillräckligt med luft         |                    |          |          |       |
| 6. Min andning är obehaglig                   |                    |          |          |       |
| 7. Min andning är utmattande                  |                    |          |          |       |
| 8. Min andning får mig att känna mig nedstämd |                    |          |          |       |
| 9. Min andning får mig att känna mig olycklig |                    |          |          |       |
| 10. Min andning är bekymmersam                |                    |          |          |       |
| 11. Min andning gör mig uppstressad           |                    |          |          |       |
| 12. Min andning är besvärande                 |                    |          |          |       |

© Royal Brompton and Harefield Trust, London and University of Salford, Greater Manchester, alla rättigheter förbehålls

D-12 - Sweden/Swedish- Version of 24 Feb 16 - Mapi.  
ID05902 / D-12\_AU10\_swe-SE.doc

## Swedish version of the Dyspnoea-12

210x297mm (300 x 300 DPI)

## COREQ (CONsolidated criteria for REporting Qualitative research) Checklist

A checklist of items that should be included in reports of qualitative research. You must report the page number in your manuscript where you consider each of the items listed in this checklist. If you have not included this information, either revise your manuscript accordingly before submitting or note N/A.

| Topic                                          | Item No. | Guide Questions/Description                                                                                                                              | Reported on Page No. |
|------------------------------------------------|----------|----------------------------------------------------------------------------------------------------------------------------------------------------------|----------------------|
| <b>Domain 1: Research team and reflexivity</b> |          |                                                                                                                                                          |                      |
| <i>Personal characteristics</i>                |          |                                                                                                                                                          |                      |
| Interviewer/facilitator                        | 1        | Which author/s conducted the interview or focus group?                                                                                                   |                      |
| Credentials                                    | 2        | What were the researcher's credentials? E.g. PhD, MD                                                                                                     |                      |
| Occupation                                     | 3        | What was their occupation at the time of the study?                                                                                                      |                      |
| Gender                                         | 4        | Was the researcher male or female?                                                                                                                       |                      |
| Experience and training                        | 5        | What experience or training did the researcher have?                                                                                                     |                      |
| <i>Relationship with participants</i>          |          |                                                                                                                                                          |                      |
| Relationship established                       | 6        | Was a relationship established prior to study commencement?                                                                                              |                      |
| Participant knowledge of the interviewer       | 7        | What did the participants know about the researcher? e.g. personal goals, reasons for doing the research                                                 |                      |
| Interviewer characteristics                    | 8        | What characteristics were reported about the interviewer/facilitator? e.g. Bias, assumptions, reasons and interests in the research topic                |                      |
| <b>Domain 2: Study design</b>                  |          |                                                                                                                                                          |                      |
| <i>Theoretical framework</i>                   |          |                                                                                                                                                          |                      |
| Methodological orientation and Theory          | 9        | What methodological orientation was stated to underpin the study? e.g. grounded theory, discourse analysis, ethnography, phenomenology, content analysis |                      |
| <i>Participant selection</i>                   |          |                                                                                                                                                          |                      |
| Sampling                                       | 10       | How were participants selected? e.g. purposive, convenience, consecutive, snowball                                                                       |                      |
| Method of approach                             | 11       | How were participants approached? e.g. face-to-face, telephone, mail, email                                                                              |                      |
| Sample size                                    | 12       | How many participants were in the study?                                                                                                                 |                      |
| Non-participation                              | 13       | How many people refused to participate or dropped out? Reasons?                                                                                          |                      |
| <i>Setting</i>                                 |          |                                                                                                                                                          |                      |
| Setting of data collection                     | 14       | Where was the data collected? e.g. home, clinic, workplace                                                                                               |                      |
| Presence of non-participants                   | 15       | Was anyone else present besides the participants and researchers?                                                                                        |                      |
| Description of sample                          | 16       | What are the important characteristics of the sample? e.g. demographic data, date                                                                        |                      |
| <i>Data collection</i>                         |          |                                                                                                                                                          |                      |
| Interview guide                                | 17       | Were questions, prompts, guides provided by the authors? Was it pilot tested?                                                                            |                      |
| Repeat interviews                              | 18       | Were repeat interviews carried out? If yes, how many?                                                                                                    |                      |
| Audio/visual recording                         | 19       | Did the research use audio or visual recording to collect the data?                                                                                      |                      |
| Field notes                                    | 20       | Were field notes made during and/or after the interview or focus group?                                                                                  |                      |
| Duration                                       | 21       | What was the duration of the interviews or focus group?                                                                                                  |                      |
| Data saturation                                | 22       | Was data saturation discussed?                                                                                                                           |                      |
| Transcripts returned                           | 23       | Were transcripts returned to participants for comment and/or                                                                                             |                      |

| Topic                                  | Item No. | Guide Questions/Description                                                                                                        | Reported on Page No. |
|----------------------------------------|----------|------------------------------------------------------------------------------------------------------------------------------------|----------------------|
|                                        |          | correction?                                                                                                                        |                      |
| <b>Domain 3: analysis and findings</b> |          |                                                                                                                                    |                      |
| <i>Data analysis</i>                   |          |                                                                                                                                    |                      |
| Number of data coders                  | 24       | How many data coders coded the data?                                                                                               |                      |
| Description of the coding tree         | 25       | Did authors provide a description of the coding tree?                                                                              |                      |
| Derivation of themes                   | 26       | Were themes identified in advance or derived from the data?                                                                        |                      |
| Software                               | 27       | What software, if applicable, was used to manage the data?                                                                         |                      |
| Participant checking                   | 28       | Did participants provide feedback on the findings?                                                                                 |                      |
| <i>Reporting</i>                       |          |                                                                                                                                    |                      |
| Quotations presented                   | 29       | Were participant quotations presented to illustrate the themes/findings?<br>Was each quotation identified? e.g. participant number |                      |
| Data and findings consistent           | 30       | Was there consistency between the data presented and the findings?                                                                 |                      |
| Clarity of major themes                | 31       | Were major themes clearly presented in the findings?                                                                               |                      |
| Clarity of minor themes                | 32       | Is there a description of diverse cases or discussion of minor themes?                                                             |                      |

Developed from: Tong A, Sainsbury P, Craig J. Consolidated criteria for reporting qualitative research (COREQ): a 32-item checklist for interviews and focus groups. *International Journal for Quality in Health Care*. 2007. Volume 19, Number 6: pp. 349 – 357

**Once you have completed this checklist, please save a copy and upload it as part of your submission. DO NOT include this checklist as part of the main manuscript document. It must be uploaded as a separate file.**
